# Supplementary material
Source: PubMed Central journal article supplement (PMC2590732)
Supplement: tpc.108.062265_1.pdf [file tpc.108.062265_1.pdf]

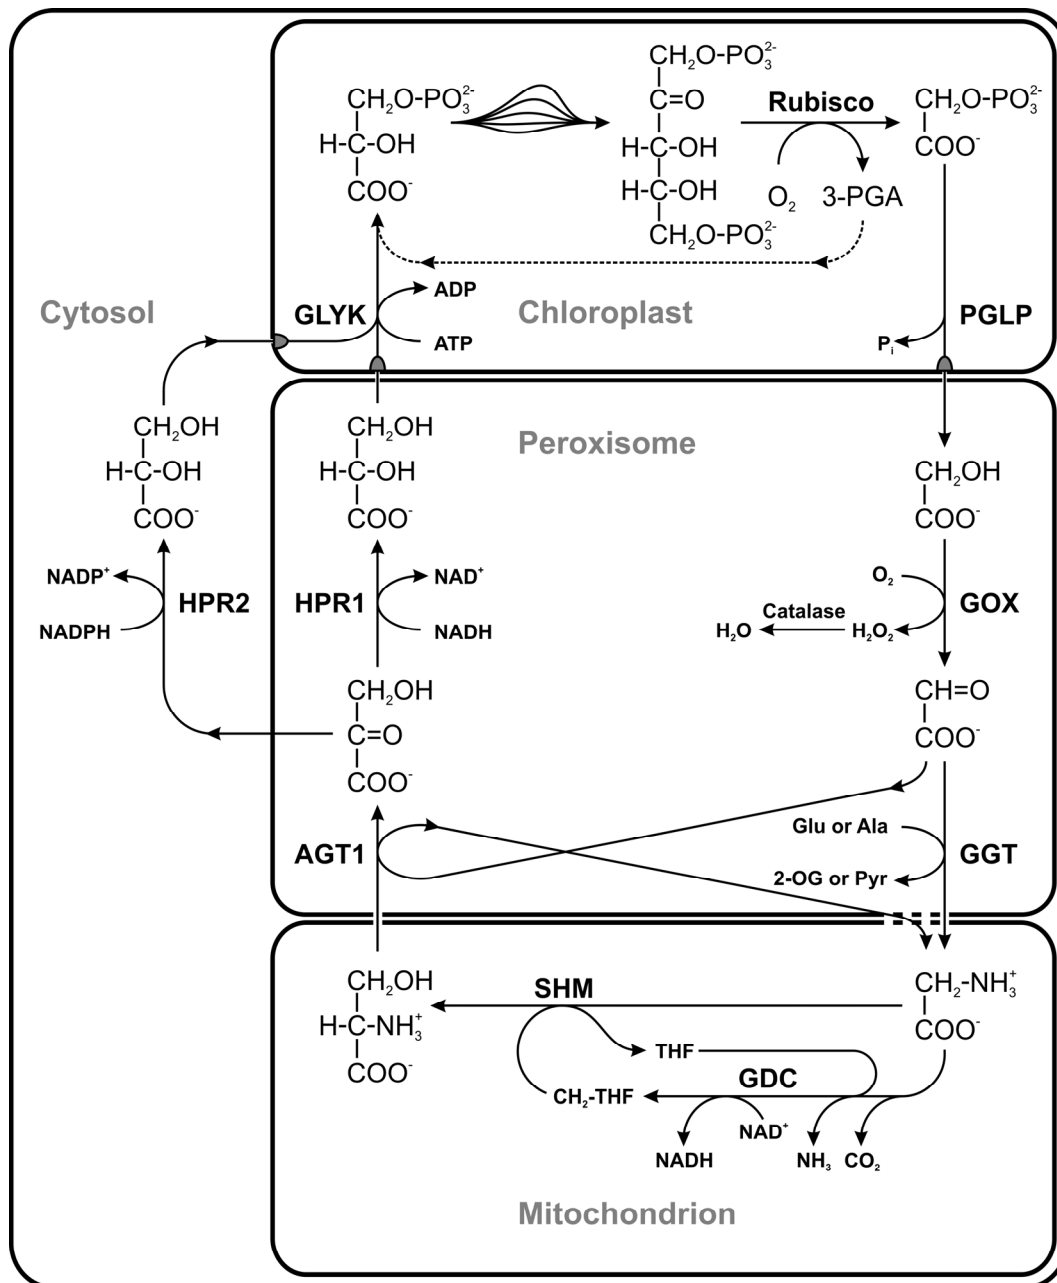

**Supplemental Figure 1.** The Photorespiratory Cycle Spans Four Cellular Compartments Including the Cytosol.

Abbreviations: Rubisco, ribulose-1,5-bisphosphate carboxylase/oxygenase; PGLP, 2-phosphoglycolate phosphatase; GOX, glycolate oxidase; GGT, glutamate:glyoxylate aminotransferase; GDC, glycine decarboxylase; SHM, serine hydroxymethyltransferase; AGT1, serine(alanine):glyoxylate aminotransferase; HPR1, peroxisomal NADH-dependent hydroxypyruvate reductase; HPR2, cytosolic NAD(P)H-dependent hydroxypyruvate reductase; GLYK, D-glycerate kinase. Further contributing enzymes, such as malate dehydrogenase or those involved in ammonia reassimilation, are not shown.

**Supplemental Table 1.** True Photosynthesis and Decarboxylation Rates of Metabolite Pools With Different Turnover Half-Times Measured at 21% Oxygen. The data represent mean values  $\pm$  SD from three independent experiments with different plants grown for 10 weeks with an 8-h photoperiod.

|                                                                          | Col-0                                              | <i>hpr1-1</i>   | Col-0                    | <i>hpr1-1</i>  |
|--------------------------------------------------------------------------|----------------------------------------------------|-----------------|--------------------------|----------------|
|                                                                          | $\mu\text{mol CO}_2 \text{ m}^{-2} \text{ s}^{-1}$ |                 | % of true photosynthesis |                |
| True photosynthesis                                                      | 6.84 $\pm$ 0.26                                    | 6.53 $\pm$ 0.23 |                          |                |
| <i>Decarboxylation of primary and stored photosynthates in the light</i> |                                                    |                 |                          |                |
| total                                                                    | 1.66 $\pm$ 0.06                                    | 1.71 $\pm$ 0.14 | 24.2 $\pm$ 0.9           | 26.1 $\pm$ 1.4 |
| photorespiratory                                                         | 1.30 $\pm$ 0.08                                    | 1.16 $\pm$ 0.04 | 18.9 $\pm$ 1.2           | 17.8 $\pm$ 0.4 |
| respiratory                                                              | 0.36 $\pm$ 0.04                                    | 0.55 $\pm$ 0.11 | 5.3 $\pm$ 0.6            | 8.3 $\pm$ 1.4  |
| <i>Decarboxylation of primary photosynthates</i>                         |                                                    |                 |                          |                |
| total                                                                    | 1.17 $\pm$ 0.06                                    | 1.05 $\pm$ 0.04 | 17.1 $\pm$ 0.9           | 16.1 $\pm$ 0.3 |
| photorespiratory                                                         | 0.91 $\pm$ 0.08                                    | 0.73 $\pm$ 0.06 | 13.3 $\pm$ 1.1           | 11.2 $\pm$ 1.3 |
| respiratory                                                              | 0.26 $\pm$ 0.02                                    | 0.32 $\pm$ 0.08 | 3.8 $\pm$ 0.3            | 4.9 $\pm$ 1.1  |
| <i>Decarboxylation of stored photosynthates</i>                          |                                                    |                 |                          |                |
| total                                                                    | 0.49 $\pm$ 0.05                                    | 0.66 $\pm$ 0.12 | 7.1 $\pm$ 0.7            | 10.0 $\pm$ 1.6 |
| photorespiratory                                                         | 0.39 $\pm$ 0.03                                    | 0.43 $\pm$ 0.10 | 5.6 $\pm$ 0.4            | 6.6 $\pm$ 1.5  |
| respiratory                                                              | 0.10 $\pm$ 0.04                                    | 0.23 $\pm$ 0.03 | 1.5 $\pm$ 0.5            | 3.4 $\pm$ 0.3  |
| <i>Respiration in the dark</i>                                           | 0.99 $\pm$ 0.05                                    | 1.43 $\pm$ 0.05 | 14.5 $\pm$ 0.7           | 22.0 $\pm$ 0.9 |

**Supplemental Table 2.** Purification Scheme for the Isolation of Arabidopsis HPR2 from *hpr1* Knockout Plants.

|                            | Total activity           | Specific activity                       | Purification |
|----------------------------|--------------------------|-----------------------------------------|--------------|
|                            | $\mu\text{mol min}^{-1}$ | $\mu\text{mol min}^{-1} \text{mg}^{-1}$ | -fold        |
| Crude extract              | 1524                     | 0.1                                     | 1            |
| Ammonium sulphate (45-75%) | 27.72                    | 0.7                                     | 7            |
| DEAE-cellulose             | 8.51                     | 1.15                                    | 11           |
| Q-Sepharose blue           | 4.27                     | 1.94                                    | 19           |
| 2',5'-ADP Sepharose        | 0.44                     | not determined                          | 463          |

**Supplemental Table 3.** Alteration of the Leaf Content of Selected Metabolites in the Individual *hpr1-1* and *hpr2-1* Knockout Plants and the *hpr1-1 hpr2-1* Double Mutant.

Plants were grown in normal air and in air with 1% CO<sub>2</sub>, respectively. Mutant-to-wild type ratios of mean relative metabolite contents ± SD (n = 6) are shown. Rosette leaves of six individual plants were analyzed per line. Rows in grey contain data used for Figure 8.

| <i>Leaf Metabolite Content Relative To the Wild-Type Plants</i> |                    |               |               |                  |                          |               |               |                  |
|-----------------------------------------------------------------|--------------------|---------------|---------------|------------------|--------------------------|---------------|---------------|------------------|
| <i>Metabolite</i>                                               | <i>Ambient Air</i> |               |               |                  | <i>1% CO<sub>2</sub></i> |               |               |                  |
|                                                                 | <i>Col-0</i>       | <i>hpr1-1</i> | <i>hpr2-1</i> | <i>hpr1 hpr2</i> | <i>Col-0</i>             | <i>hpr1-1</i> | <i>hpr2-1</i> | <i>hpr1 hpr2</i> |
| Aconitate                                                       | 1.00 ± 0.20        | 1.64 ± 0.24   | 1.46 ± 0.14   | 2.24 ± 0.15      | 1.00 ± 0.46              | 0.34 ± 0.07   | 1.05 ± 0.21   | 0.42 ± 0.11      |
| Alanine                                                         | 1.00 ± 0.11        | 0.49 ± 0.05   | 0.78 ± 0.26   | 0.64 ± 0.10      | 1.00 ± 0.09              | 0.57 ± 0.08   | 0.80 ± 0.08   | 0.39 ± 0.02      |
| Arginine                                                        | 1.00 ± 0.23        | 5.55 ± 0.86   | 1.34 ± 0.32   | 16.30 ± 8.05     | 1.00 ± 0.39              | 1.46 ± 0.68   | 0.45 ± 0.18   | 1.26 ± 0.52      |
| Asparagine                                                      | 1.00 ± 0.18        | 2.96 ± 0.54   | 0.93 ± 0.04   | 14.07 ± 7.47     | 1.00 ± 0.28              | 0.77 ± 0.13   | 0.69 ± 0.08   | 0.56 ± 0.12      |
| Aspartate                                                       | 1.00 ± 0.23        | 1.82 ± 0.29   | 2.23 ± 0.64   | 2.34 ± 0.35      | 1.00 ± 0.18              | 0.80 ± 0.10   | 0.54 ± 0.11   | 0.92 ± 0.18      |
| Citramalic acid                                                 | 1.00 ± 0.23        | 1.35 ± 0.25   | 1.68 ± 0.65   | 2.48 ± 0.33      | 1.00 ± 0.16              | 0.74 ± 0.16   | 0.85 ± 0.15   | 0.88 ± 0.09      |
| Citrate                                                         | 1.00 ± 0.22        | 0.63 ± 0.15   | 0.87 ± 0.10   | 1.48 ± 0.15      | 1.00 ± 0.17              | 0.84 ± 0.32   | 0.74 ± 0.18   | 1.38 ± 0.78      |
| Cysteine                                                        | 1.00 ± 0.11        | 0.58 ± 0.07   | 1.30 ± 0.16   | 0.81 ± 0.12      | 1.00 ± 0.21              | 1.05 ± 0.15   | 0.87 ± 0.10   | 0.90 ± 0.22      |
| Ethanolamine                                                    | 1.00 ± 0.08        | 1.66 ± 0.17   | 1.11 ± 0.11   | 3.01 ± 0.72      | 1.00 ± 0.10              | 1.92 ± 0.17   | 0.78 ± 0.08   | 1.65 ± 0.33      |

|                     | <i>Col-0</i> | <i>hpr1-1</i> | <i>hpr2-1</i> | <i>hpr1 hpr2</i> | <i>Col-0</i> | <i>hpr1-1</i> | <i>hpr2-1</i> | <i>hpr1 hpr2</i> |
|---------------------|--------------|---------------|---------------|------------------|--------------|---------------|---------------|------------------|
| Fructose            | 1.00 ± 0.11  | 0.48 ± 0.03   | 0.85 ± 0.16   | 0.51 ± 0.04      | 1.00 ± 0.15  | 4.89 ± 4.22   | 1.06 ± 0.25   | 0.84 ± 0.09      |
| Fumarate            | 1.00 ± 0.21  | 0.98 ± 0.16   | 1.16 ± 0.13   | 1.19 ± 0.12      | 1.00 ± 0.11  | 0.79 ± 0.17   | 0.76 ± 0.21   | 0.34 ± 0.11      |
| Galactose           | 1.00 ± 0.30  | 3.14 ± 1.62   | 9.97 ± 5.27   | 3.91 ± 2.67      | 1.00 ± 0.57  | 0.53 ± 0.32   | 0.14 ± 0.07   | 1.51 ± 0.83      |
| GABA                | 1.00 ± 0.26  | 1.17 ± 0.15   | 1.13 ± 0.30   | 3.15 ± 1.11      | 1.00 ± 0.19  | 1.26 ± 0.48   | 1.22 ± 0.11   | 1.10 ± 0.22      |
| Glucose             | 1.00 ± 0.39  | 0.25 ± 0.06   | 0.92 ± 0.18   | 0.18 ± 0.07      | 1.00 ± 0.45  | 1.70 ± 1.33   | 0.28 ± 0.11   | 2.49 ± 0.85      |
| Gluconic acid       | 1.00 ± 0.14  | 0.78 ± 0.08   | 1.05 ± 0.07   | 0.83 ± 0.12      | 1.00 ± 0.12  | 0.99 ± 0.09   | 0.86 ± 0.06   | 0.95 ± 0.13      |
| Glutamine           | 1.00 ± 0.24  | 2.17 ± 0.60   | 2.07 ± 0.41   | 10.67 ± 4.90     | 1.00 ± 0.34  | 1.03 ± 0.34   | 0.97 ± 0.19   | 0.53 ± 0.24      |
| Glycerate           | 1.00 ± 0.14  | 2.77 ± 0.34   | 0.88 ± 0.14   | 3.30 ± 0.65      | 1.00 ± 0.13  | 0.69 ± 0.11   | 0.51 ± 0.06   | 0.79 ± 0.15      |
| Glycerate-3-P       | 1.00 ± 0.18  | 1.51 ± 0.20   | 1.21 ± 0.11   | 2.01 ± 0.50      | 1.00 ± 0.10  | 1.02 ± 0.13   | 0.82 ± 0.18   | 1.04 ± 0.16      |
| Glycerol            | 1.00 ± 0.22  | 0.89 ± 0.08   | 0.94 ± 0.08   | 1.00 ± 0.08      | 1.00 ± 0.11  | 0.79 ± 0.05   | 1.01 ± 0.12   | 0.74 ± 0.09      |
| Glycine             | 1.00 ± 0.38  | 6.93 ± 1.29   | 0.97 ± 0.37   | 4.31 ± 0.93      | 1.00 ± 0.12  | 1.35 ± 0.81   | 0.32 ± 0.06   | 1.02 ± 0.26      |
| Glycolate           | 1.00 ± 0.12  | 3.25 ± 0.39   | 1.23 ± 0.18   | 3.59 ± 0.42      | 1.00 ± 0.14  | 0.92 ± 0.10   | 1.34 ± 0.43   | 1.44 ± 0.17      |
| Homocysteine        | 1.00 ± 0.09  | 0.64 ± 0.06   | 1.54 ± 0.33   | 0.88 ± 0.29      | 1.00 ± 0.19  | 1.09 ± 0.12   | 0.81 ± 0.20   | 0.96 ± 0.13      |
| Homoserine          | 1.00 ± 0.43  | 0.80 ± 0.17   | 0.14 ± 0.03   | 0.76 ± 0.19      | 1.00 ± 0.18  | 0.88 ± 0.14   | 0.45 ± 0.05   | 0.96 ± 0.18      |
| Hydroxylamine       | 1.00 ± 0.12  | 1.17 ± 0.06   | 0.84 ± 0.04   | 1.14 ± 0.07      | 1.00 ± 0.10  | 0.98 ± 0.12   | 0.88 ± 0.09   | 0.81 ± 0.07      |
| Hydroxybenzoic acid | 1.00 ± 0.19  | 1.22 ± 0.12   | 1.69 ± 0.16   | 1.72 ± 0.14      | 1.00 ± 0.11  | 0.83 ± 0.10   | 0.85 ± 0.11   | 0.93 ± 0.32      |

|                 | <i>Col-0</i> | <i>hpr1-1</i> | <i>hpr2-1</i> | <i>hpr1 hpr2</i> | <i>Col-0</i> | <i>hpr1-1</i> | <i>hpr2-1</i> | <i>hpr1 hpr2</i> |
|-----------------|--------------|---------------|---------------|------------------|--------------|---------------|---------------|------------------|
| Hydroxypyruvate | 1.00 ± 0.19  | 5.72 ± 1.02   | 1.48 ± 0.23   | 9.15 ± 2.85      | 1.00 ± 0.35  | 1.15 ± 0.24   | 0.51 ± 0.09   | 0.88 ± 0.27      |
| Isoleucine      | 1.00 ± 0.31  | 1.60 ± 0.12   | 1.50 ± 0.72   | 2.64 ± 0.51      | 1.00 ± 0.20  | 1.21 ± 0.35   | 1.60 ± 0.30   | 1.21 ± 0.23      |
| α-Ketoglutarate | 1.00 ± 0.14  | 6.13 ± 0.58   | 1.65 ± 0.54   | 9.93 ± 1.98      | 1.00 ± 0.12  | 0.89 ± 0.08   | 0.49 ± 0.15   | 1.85 ± 0.87      |
| L-Ascorbate     | 1.00 ± 0.18  | 0.61 ± 0.15   | 0.94 ± 0.11   | 0.15 ± 0.05      | 1.00 ± 0.41  | 1.15 ± 0.37   | 0.42 ± 0.21   | 1.26 ± 0.32      |
| Leucine         | 1.00 ± 0.37  | 1.52 ± 0.17   | 1.60 ± 0.78   | 3.14 ± 0.43      | 1.00 ± 0.14  | 1.12 ± 0.40   | 1.54 ± 0.31   | 1.25 ± 0.22      |
| Malate          | 1.00 ± 0.15  | 1.36 ± 0.18   | 1.27 ± 0.41   | 1.81 ± 0.15      | 1.00 ± 0.11  | 1.15 ± 0.02   | 0.78 ± 0.15   | 1.25 ± 0.15      |
| Maltose         | 1.00 ± 0.08  | 0.02 ± 0.04   | 1.19 ± 0.30   | 1.24 ± 0.09      | 1.00 ± 0.19  | 0.83 ± 0.16   | 1.08 ± 0.12   | 0.84 ± 0.13      |
| Methionine      | 1.00 ± 0.35  | 3.80 ± 0.77   | 1.34 ± 0.30   | 3.56 ± 1.18      | 1.00 ± 0.17  | 1.12 ± 0.25   | 0.60 ± 0.13   | 1.23 ± 0.12      |
| Inositol        | 1.00 ± 0.21  | 0.20 ± 0.02   | 1.04 ± 0.08   | 0.21 ± 0.03      | 1.00 ± 0.22  | 0.94 ± 0.13   | 0.66 ± 0.09   | 1.01 ± 0.16      |
| Phenylalanine   | 1.00 ± 0.28  | 0.28 ± 0.26   | 1.55 ± 0.75   | 2.71 ± 0.47      | 1.00 ± 0.13  | 1.16 ± 0.19   | 1.05 ± 0.10   | 1.01 ± 0.09      |
| Phosphoric acid | 1.00 ± 0.12  | 1.12 ± 0.08   | 1.28 ± 0.10   | 1.38 ± 0.05      | 1.00 ± 0.09  | 0.94 ± 0.06   | 0.99 ± 0.10   | 0.97 ± 0.06      |
| Pyroglutamate   | 1.00 ± 0.14  | 1.03 ± 0.09   | 1.18 ± 0.04   | 1.32 ± 0.16      | 1.00 ± 0.16  | 0.97 ± 0.12   | 0.12 ± 0.12   | 0.99 ± 0.10      |
| Serine          | 1.00 ± 0.19  | 2.70 ± 0.18   | 1.28 ± 0.52   | 3.87 ± 0.20      | 1.00 ± 0.04  | 2.13 ± 0.20   | 0.94 ± 0.10   | 2.15 ± 0.21      |
| Shikimate       | 1.00 ± 0.22  | 1.30 ± 0.16   | 1.12 ± 0.08   | 1.75 ± 0.39      | 1.00 ± 0.10  | 1.03 ± 0.13   | 0.83 ± 0.18   | 1.03 ± 0.14      |
| Succinate       | 1.00 ± 0.11  | 1.99 ± 0.11   | 1.55 ± 0.28   | 2.12 ± 0.10      | 1.00 ± 0.11  | 1.02 ± 0.06   | 0.74 ± 0.09   | 1.20 ± 0.15      |
| Sucrose         | 1.00 ± 0.07  | 0.56 ± 0.07   | 0.92 ± 0.20   | 0.37 ± 0.05      | 1.00 ± 0.08  | 0.65 ± 0.08   | 0.76 ± 0.05   | 0.84 ± 0.06      |

|               | <i>Col-0</i> | <i>hpr1-1</i> | <i>hpr2-1</i> | <i>hpr1 hpr2</i> | <i>Col-0</i> | <i>hpr1-1</i> | <i>hpr2-1</i> | <i>hpr1 hpr2</i> |
|---------------|--------------|---------------|---------------|------------------|--------------|---------------|---------------|------------------|
| Proline       | 1.00 ± 0.16  | 1.05 ± 0.10   | 1.35 ± 0.08   | 1.55 ± 0.29      | 1.00 ± 0.21  | 1.03 ± 0.21   | 0.77 ± 0.12   | 0.97 ± 0.14      |
| Threonic acid | 1.00 ± 0.13  | 0.57 ± 0.07   | 1.24 ± 0.17   | 0.78 ± 0.13      | 1.00 ± 0.25  | 1.05 ± 0.17   | 0.82 ± 0.10   | 0.88 ± 0.25      |
| Threonine     | 1.00 ± 0.20  | 3.76 ± 0.31   | 1.83 ± 1.00   | 7.51 ± 2.60      | 1.00 ± 0.11  | 1.30 ± 0.21   | 0.90 ± 0.10   | 1.14 ± 0.20      |
| Trehalose     | 1.00 ± 0.26  | 0.93 ± 0.21   | 1.75 ± 0.57   | 1.44 ± 0.32      | 1.00 ± 0.29  | 1.15 ± 0.48   | 0.77 ± 0.31   | 0.88 ± 0.20      |
| Valine        | 1.00 ± 0.23  | 1.01 ± 0.23   | 1.58 ± 0.63   | 1.52 ± 0.22      | 1.00 ± 0.08  | 0.83 ± 0.21   | 1.00 ± 0.14   | 0.83 ± 0.11      |
| Xylose        | 1.00 ± 0.17  | 0.40 ± 0.06   | 1.37 ± 0.55   | 0.62 ± 0.13      | 1.00 ± 0.20  | 1.01 ± 0.18   | 0.89 ± 0.14   | 0.88 ± 0.26      |

**Supplemental Table 4.** Primers used for PCR amplification of genomic DNA and cDNA. Underlined sequences indicate the introduced *Xho*I, *Spe*I and *Kpn*I sites in the primers used to produce expression constructs. ATG in bold print highlight the start codon for methionine.

R175 (SALK LB) 5'-AATCAGCTGTTGCCCGTCTCACTGGTGAA-3'  
R409 (SALK RB) 5'-ATTAAACTCCAGAAACCCGCGGCTGAG-3'  
R576 (gene trap) 5'-CCGTTTTGTATATCCCGTTTTCCGT-3'  
R379 (HPR1-S) 5'-TAGCACAAAACCGATGCCTGGAAC-3'  
R380 (HPR1-A) 5'-GTTTCCATGTCACAGGTTGTTCTC-3'  
R666 (HPR2-S) 5'-CTTCTGGACTTCTCCGGAGAAATC-3'  
R668 (HPR2-A) 5'-CCAAATCCCAAATGTGTCACATGAC-3'  
R663 (HPR1-S3) 5'-CGAACATCTCAAAGAGAACCCGATG-3'  
R664 (HPR1-A3) 5'-GAGAGTGGGTAATCGTCTAATAGACTC-3'  
R176 (S16 sense) 5'-GGCGACACAACCAGCTACTGA-3'  
R177 (S16 anti) 5'-CGGTA ACTCTTCTGGTAACGA-3'  
R659 (sense) 5'-ACTAGTGGAGAT**ATG**GAAATCAATCGGAGTCC-3'  
R660 (antisense) 5'-GGTACCTCAGACGACCGGAGTCAGAAGTGATTTTC-3'  
R686 (sense) 5'-AACTCGAGAT**GG**CGAAACCGGTGTCCATTGAA-3'  
R687 (antisense) 5'-AACTCGAGTCATAGCTTCGAAACAGGCAATCC-3'
